# Supplementary material
Source: publisher figshare collection journal article supplement (https://gsajournals.figshare.com/ndownloader/files/20183165)
Supplement: Supplementary file 1 [file 20183165]

**Figure S4**


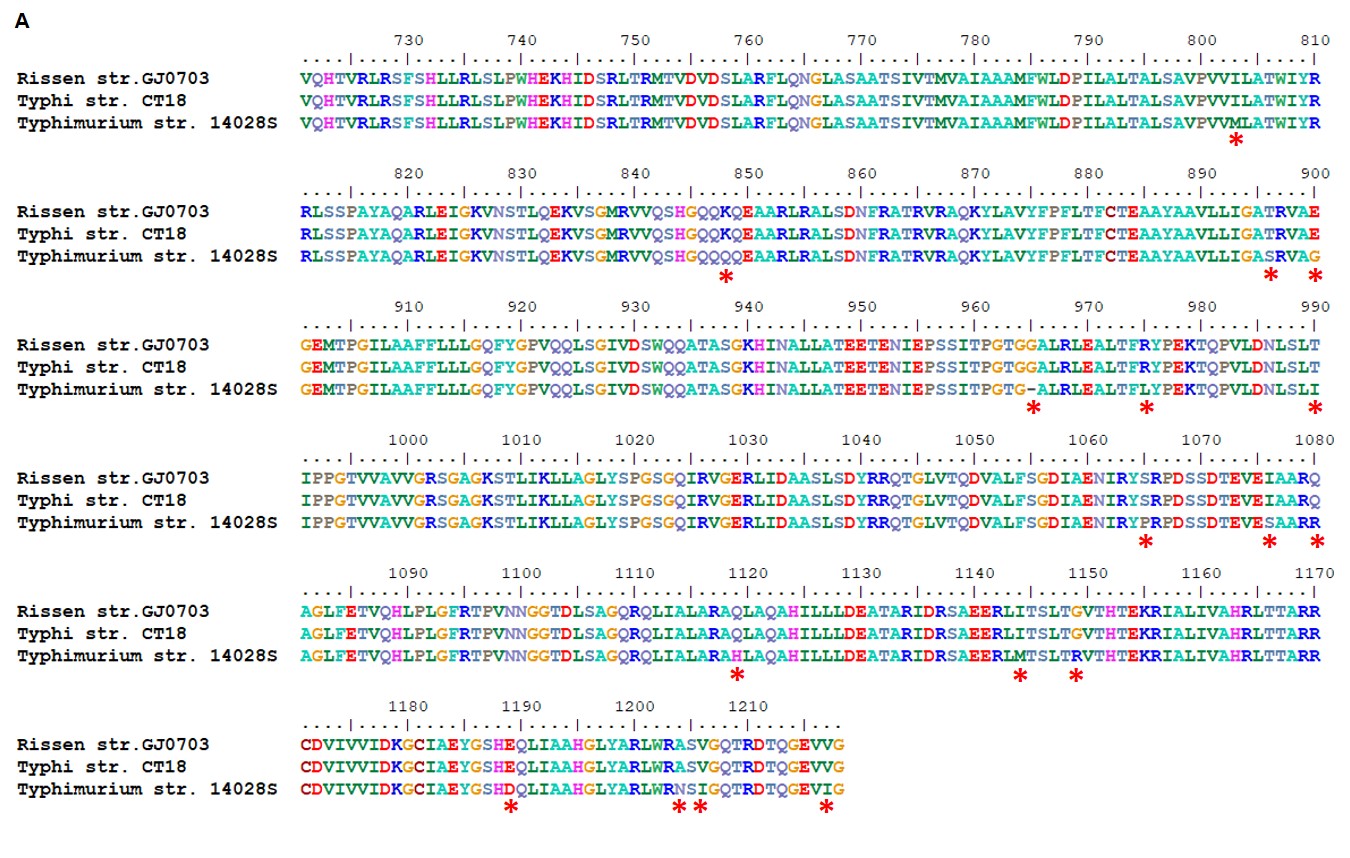


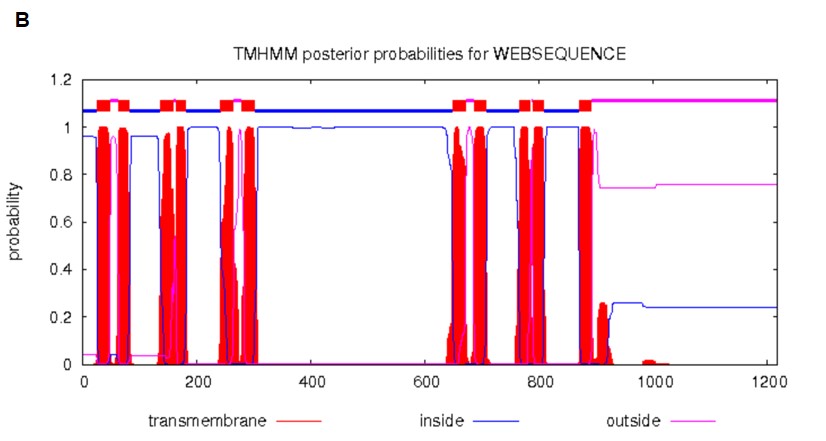


**Amino acid variation in IroC.** (A) Asterisks denote 15 amino acids variation in *S*. Rissen, S. Typhi and *S*. Typhimurium. The amino acid alignment was performed by BioEdit 7.0. (B) The prediction of transmembrane domains was performed resorting to Center for Biological Sequence analysis ([http://www.cbs.dtu.dk/ services/TMHMM/](http://www.cbs.dtu.dk/%20services/TMHMM/)). Most amino acid variations (13/15) concentrated at the C-terminal outside as shown in the black box.
